# Supplementary material for: Version 2 of the global oceanic diazotroph database
Source: Copernicus journal article supplement (doi:10.5194/essd-2023-13), 2023-01-19
Supplement: Supplementary file [file essd-2023-13-RC1-supplement.pdf]

## Review ms essd-2023-13

Shao et al. present an update of the diazotroph database published in 2012

<https://essd.copernicus.org/articles/4/47/2012/>

The new version adds up data published between 2012 and 2023, including volumetric and depth-integrated N<sub>2</sub> fixation rates, diazotroph microscope counts and nifH gene counts. This new version also discusses microscope-nifH count comparisons. While this update is valuable for the community as a tool for comparison and contextualization of diazotrophy studies, it fails to account for many diazotrophy studies published between 2012 and 2023. The text has several misinterpretations that need correction. The new version also includes N<sub>2</sub> fixation rates proxied with other methods (ARA). I think this is a major problem, since these rates are not currently solidly comparable and downplay the robustness of the database. The manuscript also eliminates nifH gene counts from non-cyanobacterial diazotrophs (NCDs), which is another major issue since NCDs are considered to be outnumber cyanobacterial diazotrophs in the ocean. Finally, the diazotroph microscopy count versus nifH gene count conversion discussion does not seem appropriate here, since very few of the papers listed have compared these approaches on a same given sample, and the issue has been discussed thoroughly in other publications by specialists. In all, while I acknowledge the effort and usefulness of this manuscript, I advise major revisions as detailed in the comments below.

L28: N<sub>2</sub> gas is not inert to diazotrophs.

L31: The balance between N loss/gains in the ETSP has been widely demonstrated to be false in several publications after that of Deutsch et al., see for example (Knapp et al. 2016; Bonnet et al. 2017).

L35: Only cyanobacterial diazotrophs can be confidently counted by microscopy.

L36: “NifH gene copies”

L40: This issue has been thoroughly discussed in (Gradoville et al. 2022), validating the use of nifH gene counts as a means to quantify diazotrophs.

L42-47: Other sources of unbalance should be briefly mentioned here.

L50: Diazotroph activity was there before, it is our notion of them that increases, the data available.

L56-57: I don't think that the dataset assembled here covers enough studies comparing microscopy and nifH based comparisons, and I strongly recommend removing this sentence and section 4.2 from the manuscript.

L61: The N<sub>2</sub> fixation rates from Tang et al. 2019 are based on an ARA-15N<sub>2</sub> fixation comparison including only 8 datapoints. This is not robust enough to provide a reliable comparison and downplays the robustness of the 15N<sub>2</sub>-based rates dataset collected here. I strongly recommend removing these from the database and derived basin-scale and global calculations. These may be mentioned as discussion and the Tang paper cited, but not included for quantitative purposes.

L72: Removing NCDs is an error in my opinion. NCDs have recurrently been shown to be dominant in the ocean (Farnelid et al. 2011; Delmont et al. 2018, 2021; Riemann, Farnelid, and Steward 2010) and may impact N cycling decisively (Riemann et al. 2022; Turk-Kubo et al. 2022). I strongly recommend that any nifH gene counts of NCDs are added. The previous database included Gamma A and Cluster III. I don't see a solid reason to remove NCDs from the database at this stage, as evidence of their importance increases.

L82: Group-specific N<sub>2</sub> fixation rates can only be estimated using single-cell approaches. I'm not sure what approach was followed here to derive specific rates, but these can certainly not be estimated with the data

collected here. I would rather recommend the authors to collect all *Trichodesmium*, UCYN-B, DDAs and UCYN-A single-cell rates published, which would be very helpful for the community. See for instance (Foster, Szejnusz, and Kuypers 2013; Foster et al. 2011; Benavides et al. 2017; Bonnet et al. 2016; Filella et al. 2022; Krupke et al. 2015; K. Harding et al. 2018; Mills et al. 2020; K. J. Harding et al. 2022; Benavides et al. 2022).

Tables 2 and 4 : Many studies are missing in this table, some include (Benavides et al. 2014, 2021; Saulia et al. 2020; Henke et al. 2018; Bonnet et al. 2018; Gradoville et al. 2017; Moreira-Coello et al. 2017; Wilson et al. 2019). Also, in the table some studies are listed as not including counts of some diazotrophs, which needs correction (e.g. Bombar 2011 and Bonnet 2015, 2019 did have qPCR counts). Please revise all these publications thoroughly and correct accordingly.

L104: The ARA method is rarely used nowadays.

L106-107: The ARA to N<sub>2</sub> fixation ratio is highly variable (Mulholland et al. 2006; Benavides et al. 2011; Wilson et al. 2012)

L110: Many other factors affect this difference, including acetylene gas impurity, Bunsen dissolution coefficient, etc.

L112: This is not true. The 15N<sub>2</sub> method is much more sensitive, does not require biomass preconcentration (biomass is concentrated during filtration, after the incubation), and requires longer incubations for enough tracer to be detectable in biomass. ARA is usually done in 3-4 h incubations and requires biomass pre-concentration to reach detectable signal (Staal et al. 2007; Benavides et al. 2011).

L120: Wannicke et al. say the opposite of Mohr and Grosskopf.

L123: What White et al. say is that the bubble release method is the most reliable and recommended by the diazotroph research community, with the elimination of rate underestimation benefits overcoming the very unlikely burdens of contamination. This should be corrected in L274-275 as well.

L150: There are 4 UCYN-A sublineages (Farnelid et al. 2016).

L328: UCYN-A has been found in symbiosis with other eukaryotic algae (Zehr et al. 2016)

L370: The first version of the database included all the authors that had contributed to its construction with their seagoing expeditions, laboratory analyses and publications. I humbly find it sad and somewhat unfair that this is not the case in this update.

## References

- Benavides, Mar, N. S. R. Agawin, J. Arístegui, P. Ferriol, and L. J. Stal. 2011. "Nitrogen Fixation by *Trichodesmium* and Small Diazotrophs in the Subtropical Northeast Atlantic." *Aquatic Microbial Ecology: International Journal*. <https://doi.org/10.3354/ame01534>.
- Benavides, Mar, Hugo Berthelot, Solange Duhamel, Patrick Raimbault, and Sophie Bonnet. 2017. "Dissolved Organic Matter Uptake by *Trichodesmium* in the Southwest Pacific." *Scientific Reports* 7: 1–6.
- Benavides, Mar, Mathieu Caffin, Solange Duhamel, Rachel Ann Foster, Olivier Grosso, Cécile Guieu, France Van Wambeke, and Sophie Bonnet. 2022. "Anomalously High Abundance of *Crocospaera* in the South Pacific Gyre." *FEMS Microbiology Letters*, April. <https://doi.org/10.1093/femsle/fnac039>.

- Benavides, Mar, L. Conradt, S. Bonnet, Ilana Berman-Frank, S. Barrillon, A. Petrenko, and Andrea Michelangelo Doglioli. 2021. "Fine Scale Sampling Unveils Diazotroph Patchiness in the South Pacific Ocean." *ISME Communications*, 1–6.
- Benavides, Mar, Y. Santana-Falcón, N. Wasmund, and J. Aristegui. 2014. "Microbial Uptake and Regeneration of Inorganic Nitrogen off the Coastal Namibian Upwelling System." *Journal of Marine Systems* 140 (PB). <https://doi.org/10.1016/j.jmarsys.2014.05.002>.
- Bonnet, Sophie, Hugo Berthelot, Kendra Turk-Kubo, Véronique Cornet-Barthaux, Sarah Fawcett, Ilana Berman-Frank, Aude Barani, et al. 2016. "Diazotroph Derived Nitrogen Supports Diatom Growth in the South West Pacific: A Quantitative Study Using NanoSIMS." *Limnology and Oceanography*. <https://doi.org/10.1002/lno.10300>.
- Bonnet, Sophie, Mathieu Caffin, Hugo Berthelot, Olivier Grosso, Mar Benavides, Sandra Helias-Nunige, Cécile Guieu, Marcus Stenegren, and Rachel Ann Foster. 2018. "In-Depth Characterization of Diazotroph Activity across the Western Tropical South Pacific Hotspot of N<sub>2</sub> Fixation (OUTPACE Cruise)." *Biogeosciences* 15 (13): 4215–32.
- Bonnet, Sophie, Mathieu Caffin, Hugo Berthelot, and Thierry Moutin. 2017. "Hot Spot of N<sub>2</sub> Fixation in the Western Tropical South Pacific Pleads for a Spatial Decoupling between N<sub>2</sub> Fixation and Denitrification." *Proceedings of the National Academy of Sciences*. <https://doi.org/10.1073/pnas.1619514114>.
- Delmont, Tom O., Juan José Pierella Karlusich, Iva Veseli, Jessika Fuessel, A. Murat Eren, Rachel A. Foster, Chris Bowler, Patrick Wincker, and Eric Pelletier. 2021. "Heterotrophic Bacterial Diazotrophs Are More Abundant than Their Cyanobacterial Counterparts in Metagenomes Covering Most of the Sunlit Ocean." *The ISME Journal*, October. <https://doi.org/10.1038/s41396-021-01135-1>.
- Delmont, Tom O., Christopher Quince, Alon Shaiber, Ozcan C. Esen, Sonny T. M. Lee, Sebastian Lucker, and A. Murat Eren. 2018. "Nitrogen-Fixing Populations Of Planctomycetes And Proteobacteria Are Abundant In The Surface Ocean." *Nature Microbiology*. <https://doi.org/10.1101/129791>.
- Farnelid, Hanna, Anders F. Andersson, Stefan Bertilsson, Waleed Abu Al-Soud, Lars H. Hansen, Søren Sørensen, Grieg F. Steward, Åke Hagström, and Lasse Riemann. 2011. "Nitrogenase Gene Amplicons from Global Marine Surface Waters Are Dominated by Genes of Non-Cyanobacteria." *PloS One* 6 (4). <https://doi.org/10.1371/journal.pone.0019223>.
- Farnelid, Hanna, Kendra Turk-Kubo, María Del Carmen Muñoz-Marín, and Jonathan P. Zehr. 2016. "New Insights into the Ecology of the Globally Significant Uncultured Nitrogen-Fixing Symbiont UCYN-A." *Aquatic Microbial Ecology: International Journal* 77 (3): 128–38.
- Filella, Alba, Lasse Riemann, France Van Wambeke, Elvira Pulido-Villena, Angela Vogts, Sophie Bonnet, Olivier Grosso, Julia M. Diaz, Solange Duhamel, and Mar Benavides. 2022. "Contrasting Roles of DOP as a Source of Phosphorus and Energy for Marine Diazotrophs." *Frontiers in Marine Science* 9. <https://doi.org/10.3389/fmars.2022.923765>.
- Foster, Rachel A., Marcel M. M. Kuypers, Tomas Vagner, Ryan W. Paerl, Niculina Musat, and Jonathan P. Zehr. 2011. "Nitrogen Fixation and Transfer in Open Ocean Diatom-Cyanobacterial Symbioses." *The ISME Journal*. <https://doi.org/10.1038/ismej.2011.26>.
- Foster, Rachel A., Saar Szejtzenszus, and Marcel M. M. Kuypers. 2013. "Measuring Carbon and N<sub>2</sub> Fixation in Field Populations of Colonial and Free-Living Unicellular Cyanobacteria Using Nanometer-Scale Secondary Ion Mass Spectrometry." *Journal of Phycology* 49 (3): 502–16.
- Gradoville, Mary R., Deniz Bombar, Byron C. Crump, Ricardo M. Letelier, Jonathan P. Zehr, and Angelicque E. White. 2017. "Diversity and Activity of Nitrogen-Fixing Communities across Ocean Basins." *Limnology and Oceanography* 62 (5): 1895–1909.
- Gradoville, Mary R., Mathilde Dugenne, Annette M. Hynes, Jonathan P. Zehr, and Angelicque E. White. 2022. "Empirical Relationship between NifH Gene Abundance and Diazotroph Cell Concentration in the North Pacific Subtropical Gyre." *Journal of Phycology*, October. <https://doi.org/10.1111/jpy.13289>.
- Harding, Katie J., Kendra A. Turk-Kubo, Esther Wing Kwan Mak, Peter K. Weber, Xavier Mayali, and Jonathan P. Zehr. 2022. "Cell-Specific Measurements Show Nitrogen Fixation by Particle-Attached

- Putative Non-Cyanobacterial Diazotrophs in the North Pacific Subtropical Gyre.” *Nature Communications* 13 (1): 1–10.
- Harding, Katie, Kendra A. Turk-Kubo, Rachel E. Sipler, Matthew M. Mills, Deborah A. Bronk, and Jonathan P. Zehr. 2018. “Symbiotic Unicellular Cyanobacteria Fix Nitrogen in the Arctic Ocean.” *Proceedings of the National Academy of Sciences*, 201813658.
- Henke, Britt A., Kendra A. Turk-Kubo, Sophie Bonnet, and Jonathan P. Zehr. 2018. “Distributions and Abundances of Sublineages of the N<sub>2</sub>-Fixing Cyanobacterium *Candidatus Atelocyanobacterium Thalassa* (UCYN-A) in the New Caledonian Coral Lagoon.” *Frontiers in Microbiology*. <https://doi.org/10.3389/fmicb.2018.00554>.
- Knapp, Angela N., Karen L. Casciotti, William M. Berelson, Maria G. Prokopenko, and Douglas G. Capone. 2016. “Low Rates of Nitrogen Fixation in Eastern Tropical South Pacific Surface Waters.” *Proceedings of the National Academy of Sciences* 113 (16): 4398–4403.
- Krupke, Andreas, Wiebke Mohr, Julie Laroche, Bernhard M. Fuchs, Rudolf I. Amann, and Marcel M. M. Kuypers. 2015. “The Effect of Nutrients on Carbon and Nitrogen Fixation by the UCYN-A-Haptophyte Symbiosis.” *The ISME Journal* 9 (7): 1635–47.
- Mills, Matthew M., Kendra A. Turk-Kubo, Gert L. van Dijken, Britt A. Henke, Katie Harding, Samuel T. Wilson, Kevin R. Arrigo, and Jonathan P. Zehr. 2020. “Unusual Marine Cyanobacteria/Haptophyte Symbiosis Relies on N<sub>2</sub> Fixation Even in N-Rich Environments.” *The ISME Journal*, no. 3: 2395–2406.
- Moreira-Coello, Víctor, Beatriz Mouriño-Carballido, Emilio Marañón, Ana Fernández-Carrera, Antonio Bode, and Marta M. Varela. 2017. “Biological N<sub>2</sub> Fixation in the Upwelling Region off NW Iberia: Magnitude, Relevance, and Players.” *Frontiers in Marine Science*. <https://doi.org/10.3389/fmars.2017.00303>.
- Mulholland, Margaret R., Peter W. Bernhardt, Cynthia a. Heil, Deborah a. Bronk, and Judith M. O’ Neil. 2006. “Nitrogen Fixation and Release of Fixed Nitrogen by *Trichodesmium* Spp. in the Gulf of Mexico.” *Limnology and Oceanography* 51 (4): 1762–76.
- Riemann, Lasse, Hanna Farnelid, and Grieg F. Steward. 2010. “Nitrogenase Genes in Non-Cyanobacterial Plankton: Prevalence, Diversity and Regulation in Marine Waters.” *Aquatic Microbial Ecology: International Journal* 61 (3): 235–47.
- Riemann, Lasse, Eyal Rahav, Uta Passow, Hans-Peter Grossart, Dirk de Beer, Isabell Klawonn, Meri Eichner, Mar Benavides, and Edo Bar-Zeev. 2022. “Planktonic Aggregates as Hotspots for Heterotrophic Diazotrophy: The Plot Thickens.” *Frontiers in Microbiology* 0. <https://doi.org/10.3389/fmicb.2022.875050>.
- Saulia, Emmrick, Mar Benavides, Britt Henke, Kendra Turk-Kubo, Haley Cooperguard, Olivier Grosso, Anne Desnues, et al. 2020. “Seasonal Shifts in Diazotrophs Players: Patterns Observed Over a Two-Year Time Series in the New Caledonian Lagoon (Western Tropical South Pacific Ocean).” *Frontiers in Marine Science* 7 (November): 1–11.
- Staal, Marc, Sacco Te Lintel Hekkert, Geert Jan Brummer, Marcel Veldhuis, Cor Sikkens, Stefan Persijn, and Lucas J. Stal. 2007. “Nitrogen Fixation along a North – South Transect in the Eastern Atlantic Ocean.” *Limnology and Oceanography* 52 (4): 1305–16.
- Turk-Kubo, Kendra A., Mary R. Gradoville, Shunyan Cheung, Francisco Cornejo-Castillo, Katie J. Harding, Michael Morando, Matthew Mills, and Jonathan P. Zehr. 2022. “Non-Cyanobacterial Diazotrophs: Global Diversity, Distribution, Ecophysiology, and Activity in Marine Waters.” *FEMS Microbiology Reviews*, November. <https://doi.org/10.1093/femsre/fuac046>.
- Wilson, Samuel T., Daniela Böttjer, Matthew J. Church, and David M. Karl. 2012. “Comparative Assessment of Nitrogen Fixation Methodologies, Conducted in the Oligotrophic North Pacific Ocean.” *Applied and Environmental Microbiology* 78 (18): 6516–23.
- Wilson, Samuel T., Nicholas J. Hawco, E. Virginia Armbrust, Benedetto Barone, Karin M. Björkman, Angela K. Boysen, Macarena Burgos, et al. 2019. “Kilauea Lava Fuels Phytoplankton Bloom in the North Pacific Ocean.” *Science* 365 (6457): 1040–44.
- Zehr, Jonathan P., Irina N. Shilova, Hanna M. Farnelid, Maria Del Carmen Muñoz-Maríncarmen, and Kendra A. Turk-Kubo. 2016. “Unusual Marine Unicellular Symbiosis with the Nitrogen-Fixing

Cyanobacterium UCYN-A.” *Nature Microbiology* 2 (December).  
<https://doi.org/10.1038/nmicrobiol.2016.214>.
